# Supplementary material for: Bioaccessibility of Bioactive Compounds of ‘Fresh Garlic’ and ‘Black Garlic’ through In Vitro Gastrointestinal Digestion
Source: PubMed Central journal article supplement (PMC7693347; doi:10.3390/foods9111582), 2020-10-31
Supplement: foods-09-01582-s001.pdf [file foods-09-01582-s001.pdf]

## SUPPLEMENTARY INFORMATION

### **Bioaccessibility of Bioactive Compounds of ‘Fresh Garlic’ and ‘Black Garlic’ Through *In-Vitro* Gastrointestinal Digestion.**

Alicia Moreno-Ortega<sup>a,b</sup>, Gema Pereira-Caro<sup>a\*</sup>, José Luis Ordóñez<sup>a</sup>, Rafael Moreno-Rojas<sup>b</sup>, Víctor Ortíz-Somovilla<sup>a</sup>, José Manuel Moreno-Rojas<sup>a\*</sup>

<sup>a</sup>Department of Food Science and Health, Andalusian Institute of Agricultural and Fisheries Research and Training (IFAPA), Alameda del Obispo, Avda. Menéndez-Pidal, s/n. 14004, Córdoba, Spain

<sup>b</sup>Departamento de Bromatología y Tecnología de los Alimentos, Campus Rabanales, Ed. Darwin-anexo Universidad de Córdoba, 14071, Córdoba, Spain

\*Corresponding authors:

Gema Pereira-Caro ([mariag.pereira@juntadeandalucia.es](mailto:mariag.pereira@juntadeandalucia.es))

José Manuel Moreno-Rojas ([josem.moreno.rojas@juntadeandalucia.es](mailto:josem.moreno.rojas@juntadeandalucia.es))

IFAPA-Alameda del Obispo, Department of Food Science and Health, Avenida Menéndez Pidal, S/N, 14071 Córdoba (Spain). Tel. 0034 671 532 734

**Table S1.** Details of the Simulated Salivary Fluid (SSF), Simulated Gastric Fluid (SGF) and Simulated Intestinal Fluid (SIF)

|            | <b>MgCl<sub>2</sub>(H<sub>2</sub>O)<sub>6</sub> (0.15 M)</b> | <b>KCl (0.5 M)</b> | <b>KH<sub>2</sub>PO<sub>4</sub> (0.5 M)</b> | <b>(NH<sub>4</sub>)<sub>2</sub>CO<sub>3</sub> (0.5 M)</b> | <b>NaHCO<sub>3</sub> (1 M)</b> | <b>NaCl (2 M)</b> | <b>Distilled Water</b> | <b>Final Volume</b> |
|------------|--------------------------------------------------------------|--------------------|---------------------------------------------|-----------------------------------------------------------|--------------------------------|-------------------|------------------------|---------------------|
|            | <b>mL</b>                                                    |                    |                                             |                                                           |                                |                   |                        |                     |
| <b>SSF</b> | 0.313                                                        | 9.438              | 2.313                                       | 0.038                                                     | 4.250                          | -                 | 233.650                | <b>250.0</b>        |
| <b>SGF</b> | 0.250                                                        | 4.313              | 0.563                                       | 0.313                                                     | 7.813                          | 7.375             | 229.375                | <b>250.0</b>        |
| <b>SIF</b> | 0.688                                                        | 4.250              | 0.500                                       | 0.688                                                     | 26.563                         | 6.000             | 211.313                | <b>250.0</b>        |

**Table S2.** HPLC-HRMS-Based Identifications of (Poly)phenols in Fresh and Black Garlics

| Peak | RT   | Compound                | Chemical Formula [m/z] <sup>-</sup> | Experimental Mass [m/z] <sup>-</sup> | $\delta$ (ppm) | MSI MI level <sup>a</sup> |
|------|------|-------------------------|-------------------------------------|--------------------------------------|----------------|---------------------------|
| 1    | 4.7  | Epigallocatechin        | C15H13O7                            | 305.066                              | -0.48          | 2                         |
| 2    | 7.2  | Benzoic Acid            | C7H5O2                              | 121.028                              | 0.68           | 1                         |
| 3    | 8.0  | Chlorogenic acid        | C16H17O9                            | 353.087                              | -1.13          | 1                         |
| 4    | 8.2  | Catechin                | C15H13O6                            | 289.071                              | -1.09          | 1                         |
| 5    | 8.3  | Caffeic acid            | C9H7O4                              | 179.034                              | 0.28           | 1                         |
| 6    | 9.7  | Gallic acid             | C7H5O5                              | 169.013                              | -2.15          | 1                         |
| 7    | 11.7 | Epicatechin             | C15H13O6                            | 289.071                              | -1.09          | 1                         |
| 8    | 18.9 | Vanillic acid           | C8H7O4                              | 167.034                              | 0.67           | 2                         |
| 9    | 21.1 | Ferulic acid            | C10H9O4                             | 193.050                              | 1.79           | 1                         |
| 10   | 24.4 | <i>p</i> -Coumaric acid | C9H7O3                              | 163.039                              | -1.96          | 1                         |

<sup>a</sup>Metabolite standards initiative (MSI) metabolite identification (MI) levels [1]. Reference compounds were available for all compounds identified at MSI MI level

**Table S3.** HPLC-HRMS-Based Identifications of organosulfur compounds in Fresh and Black Garlics

| Peak | RT   | Compound                                                     | Chemical Formula [m/z] <sup>+</sup> | Experimental Mass [m/z] <sup>+</sup> | $\delta$ (ppm) | MSI MI level <sup>a</sup> |
|------|------|--------------------------------------------------------------|-------------------------------------|--------------------------------------|----------------|---------------------------|
| 1    | 4.2  | S-Allylmercapto-L-cysteine (SAMC)                            | C6H12NO2S2                          | 194.030                              | 0.85           | 2                         |
| 2    | 4.6  | S-Allylcysteine (SAC)                                        | C6H12NO2S                           | 162.058                              | -1.9           | 1                         |
| 3    | 5.7  | S-Methylcysteine (Deoxymethiin)                              | C4H10NO2S                           | 136.043                              | 0.11           | 2                         |
| 4    | 5.8  | S-Propyl-L-cysteine sulfoxide (Propiin)                      | C6H14NO3S                           | 180.069                              | 2.45           | 2                         |
| 5    | 5.9  | S-(S-propyl) cysteine                                        | C6H14NO2S2                          | 196.046                              | 0.36           | 2                         |
| 6    | 5.9  | Cycloalliin                                                  | C6H12NO3S                           | 178.053                              | -1.36          | 2                         |
| 7    | 6.6  | $\gamma$ -Glutamyl-S-(S-1-propenyl) cysteine (GS1PC)         | C11H19N2O5S                         | 291.101                              | 1.65           | 2                         |
| 8    | 6.7  | $\gamma$ -Glutamyl-S-allylmercaptocysteine (GSAMC)           | C11H19N2O5S2                        | 323.073                              | -1.9           | 2                         |
| 9    | 6.8  | S-Allylsulfenic acid (Lacrimatory factor)                    | C3H7OS                              | 91.021                               | 3.42           | 2                         |
| 10   | 6.8  | N-Acetyl-S-allyl-L-cysteine (NASAC)                          | C8H14NO3S                           | 204.069                              | -1.39          | 2                         |
| 11   | 6.8  | Alliin                                                       | C6H12NO3S                           | 178.053                              | -2.82          | 1                         |
| 12   | 6.8  | $\gamma$ -Glutamyl-S-(S-1-propenyl)cysteine-glycine          | C13H22N3O6S2                        | 380.094                              | 0.92           | 2                         |
| 13   | 7.0  | S-(2-carboxypropyl) cysteine                                 | C7H14NO4S                           | 208.064                              | -2.15          | 2                         |
| 14   | 7.1  | Trans-S-(1-propenyl)-L-cysteine (S1PC)                       | C6H12NO2S                           | 162.058                              | -0.70          | 2                         |
| 15   | 7.3  | $\gamma$ -Glutamyl-S-allyl-L-cysteine (GSAC)                 | C11H19N2O5S                         | 291.101                              | 1.86           | 2                         |
| 16   | 7.4  | S-Allylglutathione                                           | C13H22N3O6S                         | 348.122                              | -0.23          | 2                         |
| 17   | 7.6  | S-Methyl-L-cysteine sulfoxide (Methiin)                      | C4H10NO3S                           | 152.038                              | -1.33          | 2                         |
| 18   | 7.6  | $\gamma$ -Glutamyl-S-(S-methyl)cysteine-glycine              | C11H20N3O6S2                        | 354.079                              | -0.51          | 2                         |
| 19   | 7.7  | Methionine sulfoxide                                         | C5H11NO3S                           | 166.053                              | 1.94           | 2                         |
| 20   | 8.5  | $\gamma$ -Glutamyl-cysteine                                  | C8H15N2O5S                          | 251.070                              | -2.45          | 2                         |
| 21   | 8.6  | $\gamma$ -Glutamyl-S-(2-carboxypropyl)cysteine-glycine       | C14H24N3O8S                         | 394.128                              | 0.67           | 2                         |
| 22   | 9.0  | $\gamma$ -Glutamyl-S-(1-propenyl) cysteine sulfoxide (G1PCS) | C11H19N2O6S                         | 307.096                              | -2.05          | 2                         |
| 23   | 9.2  | $\gamma$ -Glutamyl-S-methyl-L-cysteine (GSMC)                | C9H17N2O5S                          | 265.085                              | 1.56           | 2                         |
| 24   | 10.0 | $\gamma$ -Glutamyl-S-methyl-L-cysteine sulfoxide (GSMCS)     | C9H17N2O6S                          | 281.080                              | 2.19           | 2                         |

<sup>a</sup>Metabolite standards initiative (MSI) metabolite identification (MI) levels [1]. Reference compounds were available for all compounds identified at MSI MI level

1

## References

1. Sumner, L.W.; Amberg, A.; Barrett, D.; Beale, M.H.; Beger, R.; Daykin, C.A.; W-M Fan, T.; Fiehn, O.; Goodacre, R.; Griffin, J.L.; et al.

Proposed minimum reporting standards for chemical analysis Chemical Analysis Working Group (CAWG) Metabolomics Standards Initiative  
(MSI) *NIH Public Access. Metabolomics* **2007**, 3, 211–221, doi:10.1007/s11306-007-0082-2.
